# Supplementary material for: Study of electrospun nanofibers loaded with Ru( ii ) phenanthroline complexes as a potential material for use in dye-sensitized solar cells (DSSCs)
Source: Royal Society of Chemistry journal article supplement (doi:10.1039/d3ra07283e), 2023-01-01
Supplement: d3ra07283e1.pdf [file d3ra07283e1.pdf]

## **Study of electrospun nanofibers loaded with Ru(II) phenanthroline complexes as a potential material for use in dye-sensitized solar cells (DSSCs).**

Luis Jesús Villarreal Gómez<sup>a,b\*</sup>, Ana Leticia Iglesias<sup>a,b\*</sup>, Valentín Miranda Soto<sup>c</sup>, Amelia Livas Sarabia<sup>d</sup> Ricardo Valdez Castro<sup>d</sup>, Eduardo Alberto López Maldonado<sup>b</sup>, Mercedes Teresita Oropeza Guzman<sup>c</sup>, Christian Alfonso Romero Soto<sup>a,c</sup>, Eder German Lizarraga Medina<sup>a</sup>, Jorge Luis Vazquez Arce<sup>d</sup>

<sup>a</sup>Facultad de Ciencias de la Ingeniería y Tecnología, Universidad Autónoma de Baja California, Unidad Valle de las Palmas, Tijuana, Baja California, México

<sup>b</sup>Facultad de Ciencias Químicas e Ingeniería, Universidad Autónoma de Baja California, Unidad Otay, Tijuana, Baja California, México

<sup>c</sup>Centro de Graduados e Investigación en Química, Instituto Tecnológico de Tijuana, Tijuana, Baja California, México

<sup>d</sup>Centro de Nanociencias y Nanotecnología, Universidad Nacional Autónoma de México.

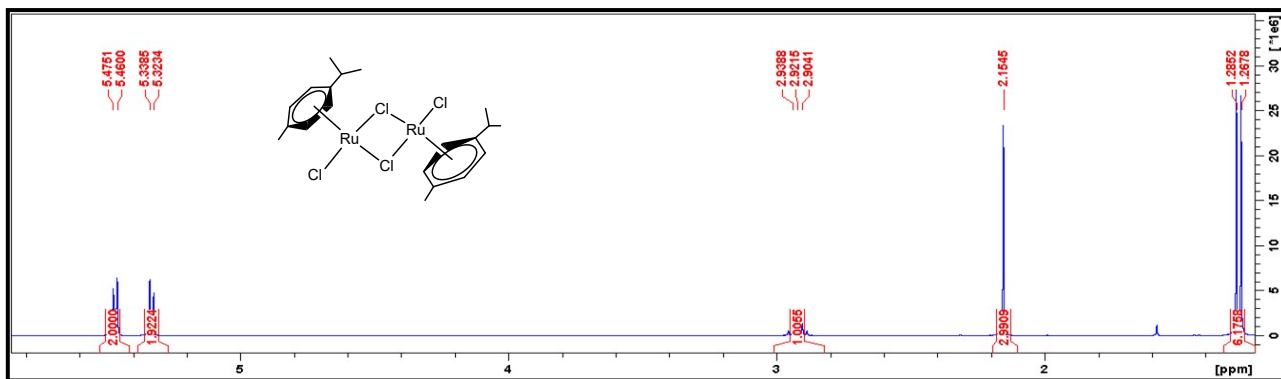

Figure S1. Full  $^1\text{H}$  NMR of  $[\text{RuCl}_2(p\text{-cymene})]_2$  in  $\text{CDCl}_3$  (400 MHz)

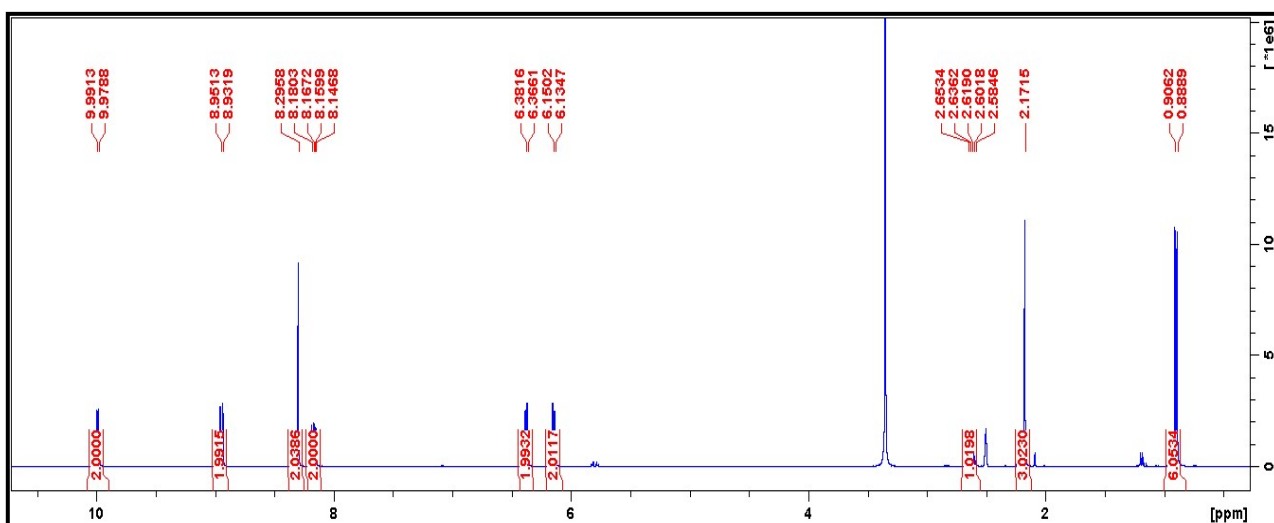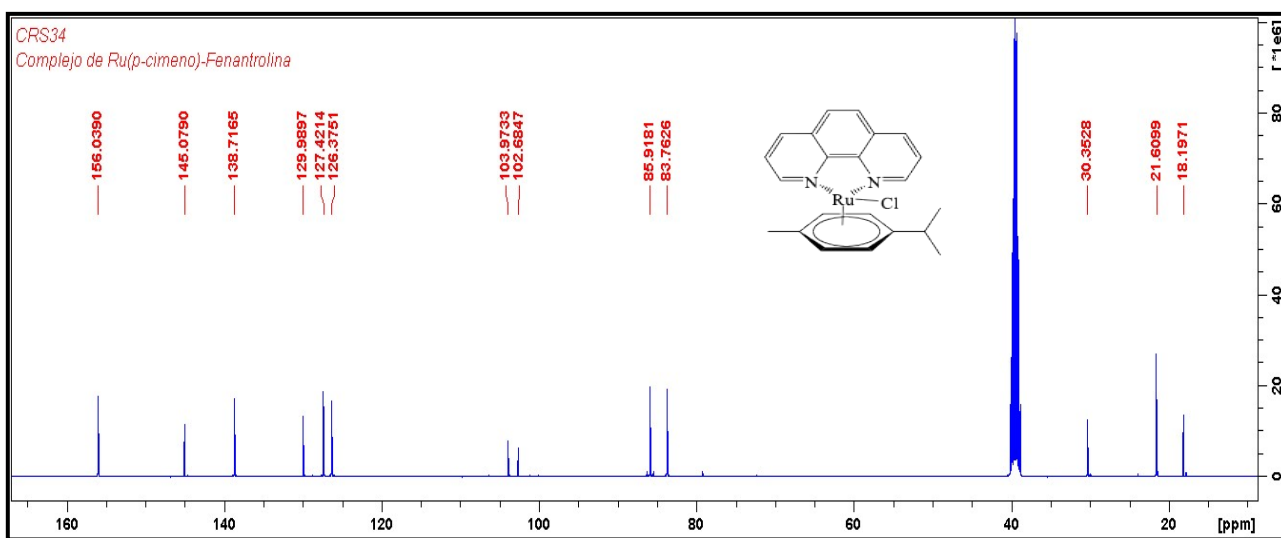

Figure S2. Full  $^1\text{H}$  NMR (top) and  $^{13}\text{C}$  NMR (bottom) of complex **Ru-1** in  $\text{DMSO}_d_6$  (400 MHz)

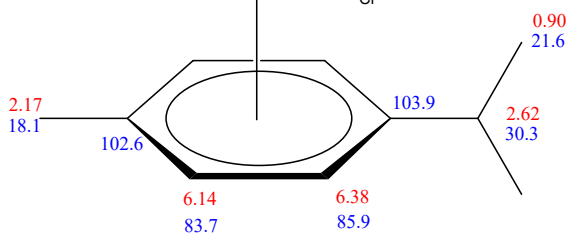

|                                    |                                          |                                          |
|------------------------------------|------------------------------------------|------------------------------------------|
| <b>HSQC</b>                        | <b>COSY</b>                              |                                          |
| <b>Group CH=N</b>                  | 0.90 2.62                                | 8.16 <sup>3</sup> ↔ 129.9                |
| 9.99 156.0                         | 6.14 6.38                                | <sup>2</sup> ↔ 156.0                     |
| <b>Grupos CH aromatic</b>          | 8.16 8.94                                | <sup>2</sup> 8.30 ↔ 129.9                |
| 6.14 83.7                          | 9.99                                     | <sup>3</sup> ↔ 138.7                     |
| 6.38 85.9                          | <b><sup>1</sup>H-<sup>13</sup>C HMBC</b> | <sup>3</sup> ↔ 145.0                     |
| 8.16 126.3                         | 0.90 ↔ 21.6                              | <sup>3</sup> 8.94 ↔ 127.4                |
| 8.30 127.4                         | <sup>2</sup> ↔ 30.3                      | <sup>3</sup> ↔ 145.0                     |
| 8.94 138.7                         | <sup>3</sup> ↔ 103.9                     | <sup>3</sup> ↔ 156.0                     |
| <b>Grupos Alkyl CH<sub>3</sub></b> | 2.17 ↔ 83.75                             | <sup>2</sup> 9.99 ↔ 126.3                |
| 0.90 21.6                          | <sup>2</sup> ↔ 102.6                     | <sup>3</sup> ↔ 138.7                     |
| 2.17 18.1                          | 2.62 ↔ 21.6                              | <sup>3</sup> ↔ 145.0                     |
| <b>Grupos CH alkyl</b>             | <sup>3</sup> ↔ 85.9                      |                                          |
| 2.62 30.3                          | <sup>2</sup> ↔ 103.9                     |                                          |
| <b>Ispo carbons</b>                | 6.14 ↔ 85.9                              | <b><sup>1</sup>H-<sup>15</sup>N HMBC</b> |
| 102.6                              | <sup>3</sup> ↔ 103.9                     | <sup>2</sup> 8.16 ↔ 235.8                |
| 103.9                              | <sup>2</sup> ↔ 103.9                     |                                          |
| 129.0                              | 2.62 ↔ 21.6                              |                                          |
| 145.0                              | 6.14 ↔ 85.9                              |                                          |

**Figure S3.** <sup>1</sup>H RMN data in red, <sup>13</sup>C NMR data in blue, and <sup>15</sup>N NMR data in black.

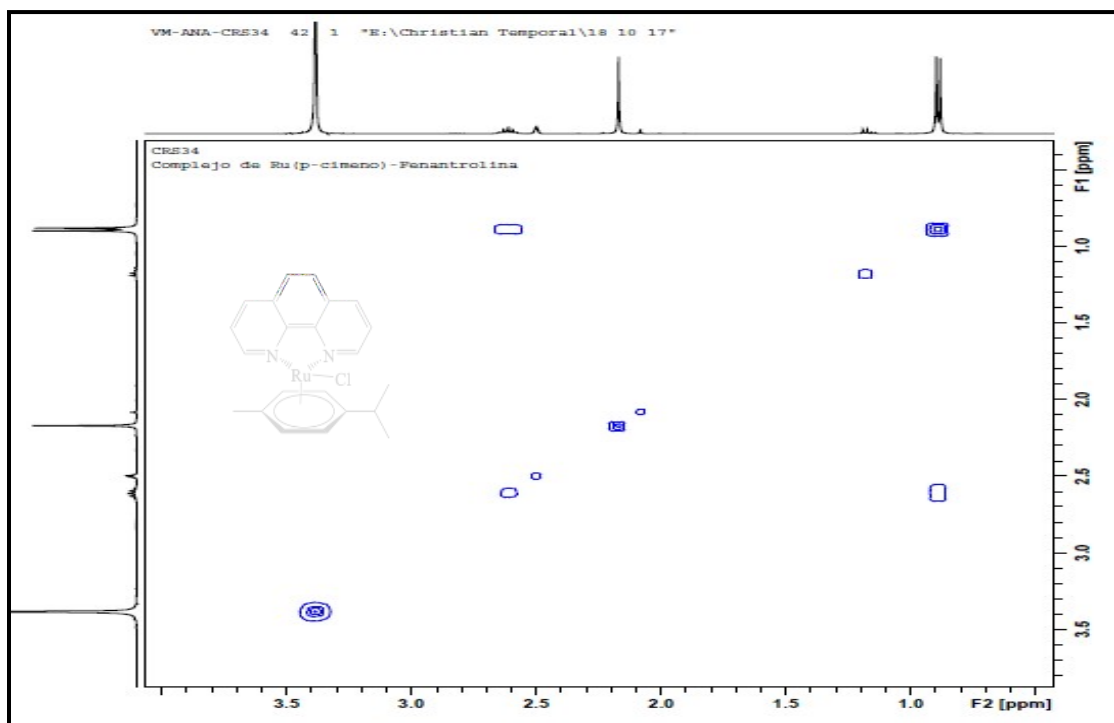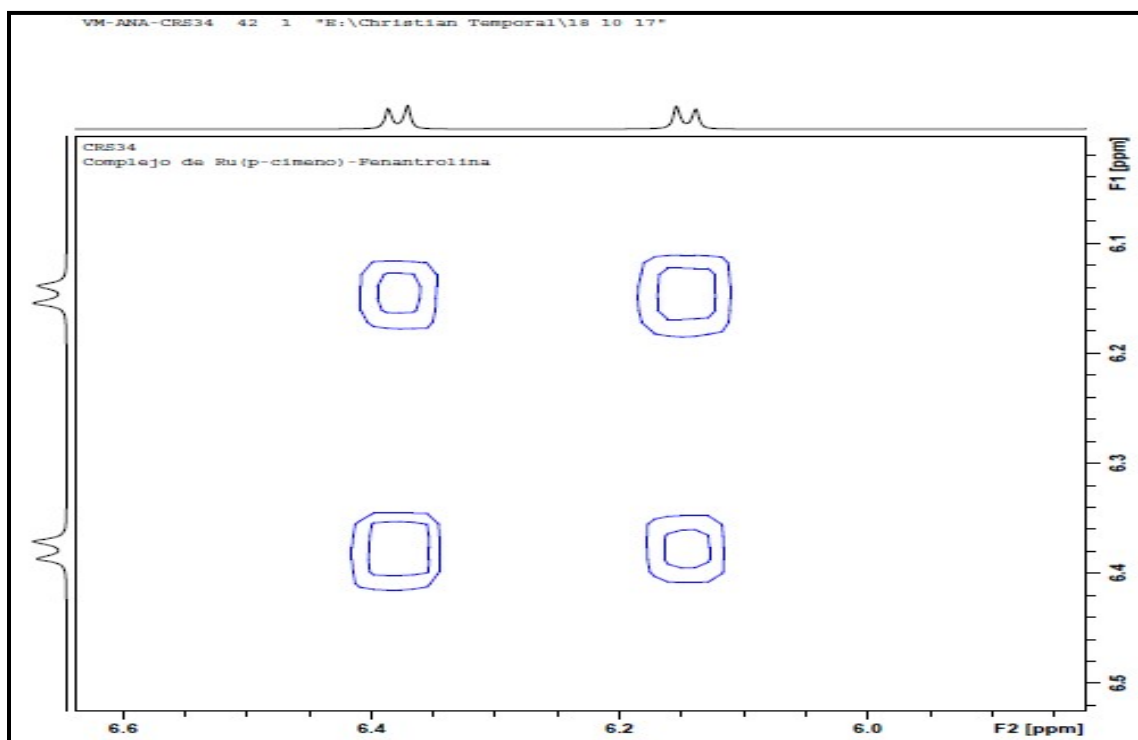

Figure S4. Partial  $^1\text{H}$ - $^1\text{H}$  gCOSY NMR of **Ru-1** in  $\text{DMSO}_d_6$  (400 MHz)

Figure S5. Partial  $^1\text{H}$ - $^1\text{H}$  gCOSY NMR of **Ru-1** in  $\text{DMSO}_d_6$  (400 MHz)

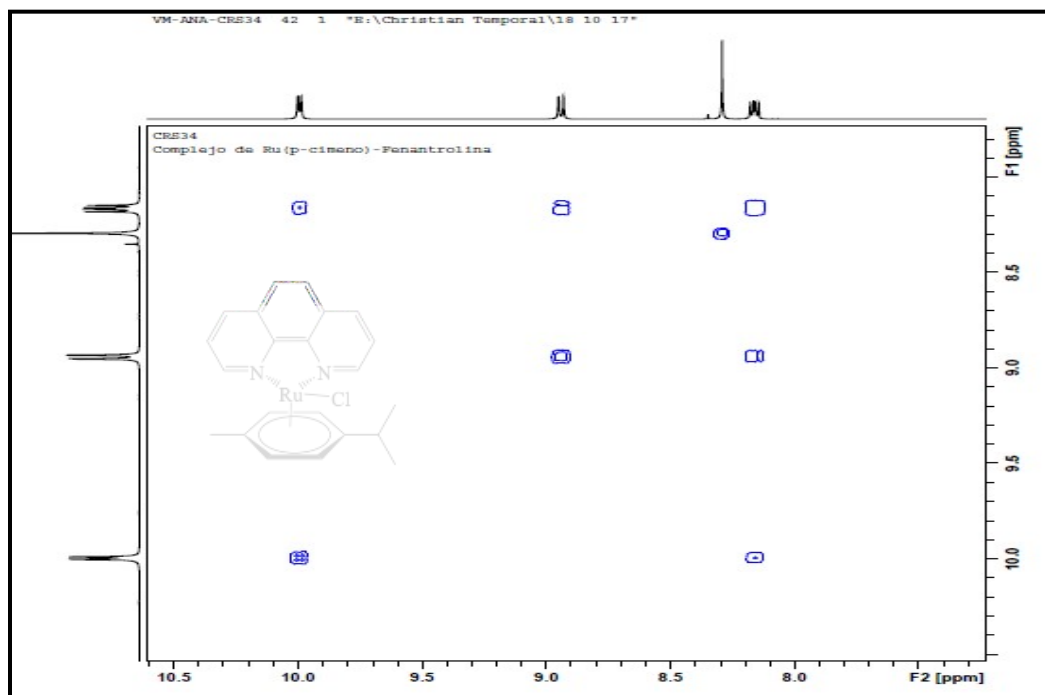

Figure S6. Partial  $^1\text{H}$ - $^1\text{H}$  gCOSY NMR of **Ru-1** in  $\text{DMSO}_d_6$  (400 MHz)

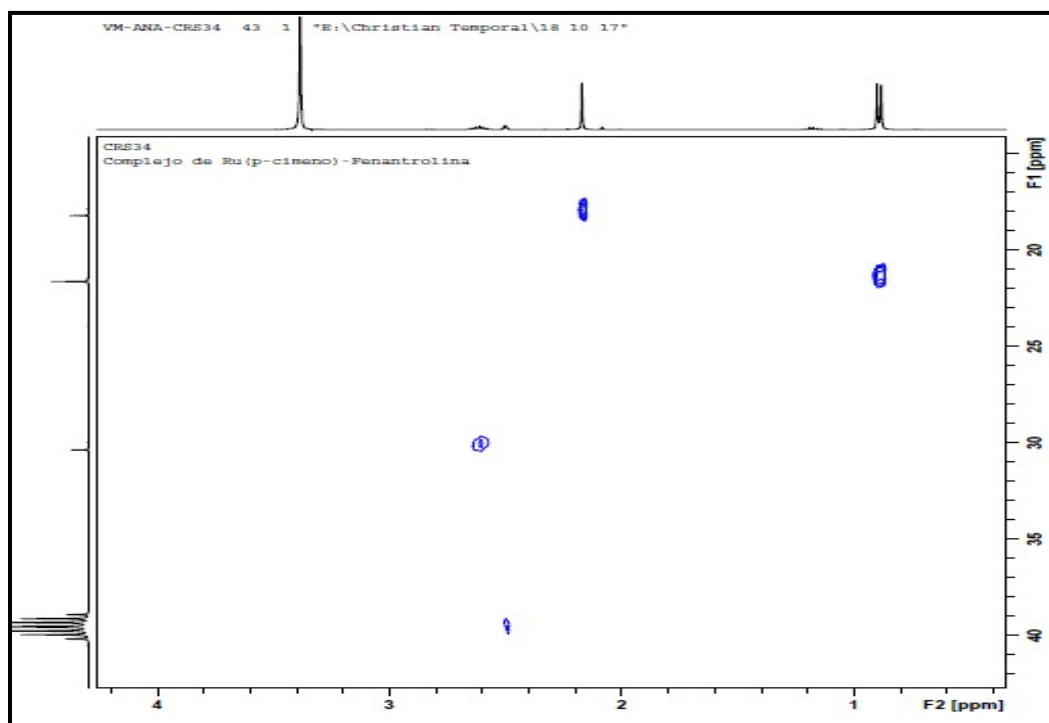

Figure S7. Partial  $^1\text{H}$ - $^{13}\text{C}$  gHSQC NMR of **Ru-1** in  $\text{DMSO}_d_6$  (400 MHz)

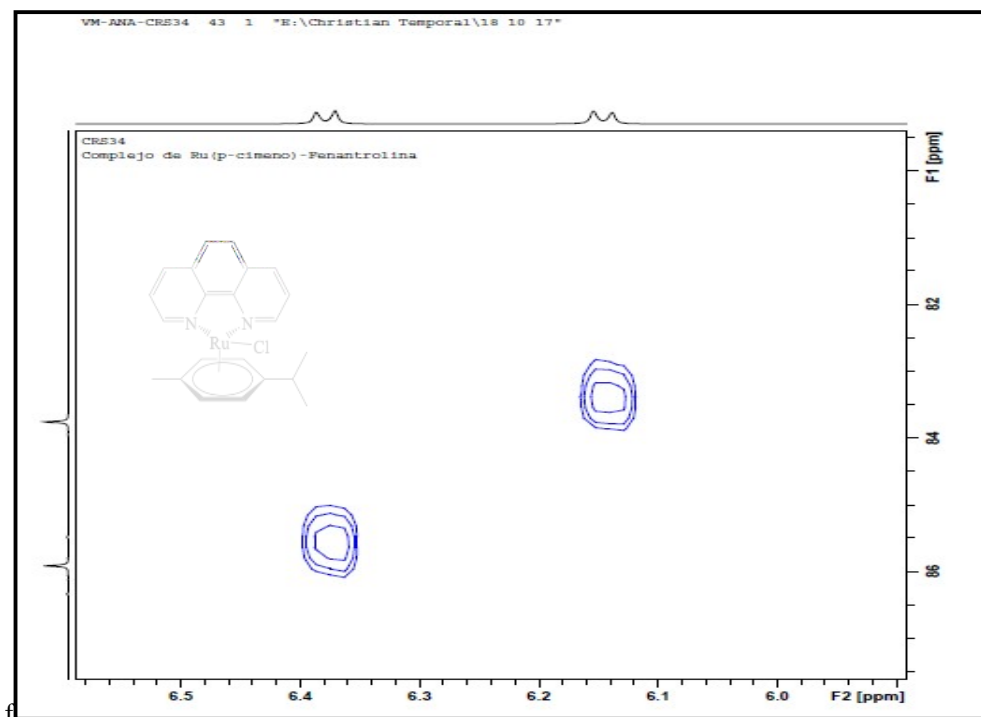

**Figure S8.** Partial  $^1\text{H}$ - $^{13}\text{C}$  gHSQC NMR of **Ru-1** in  $\text{DMSO}d_6$  (400 MHz)

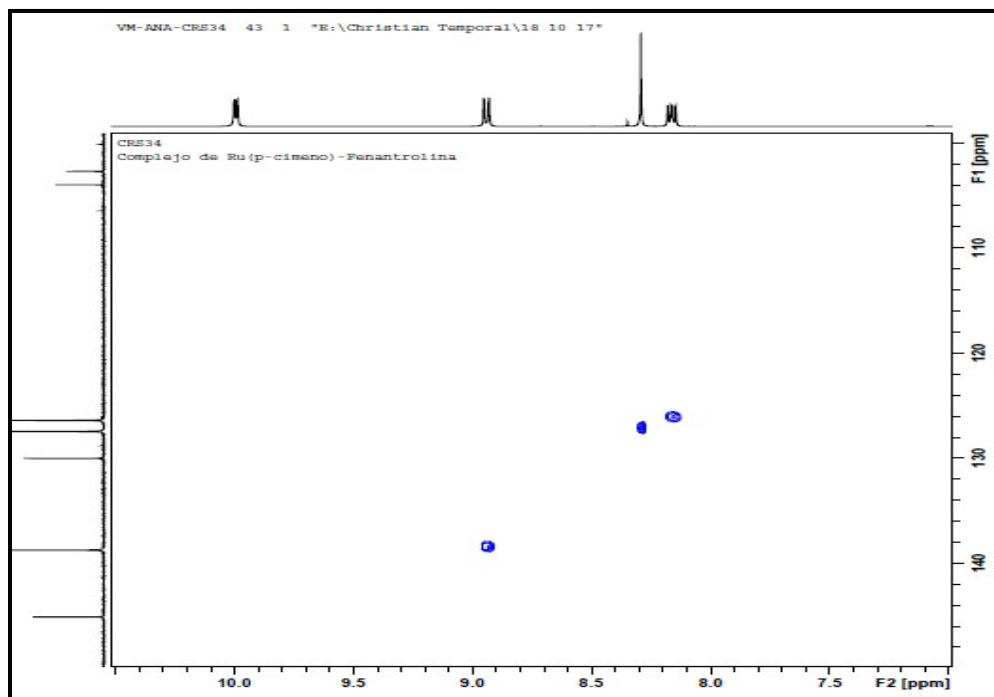

**Figure S9.** Partial  $^1\text{H}$ - $^{13}\text{C}$  gHSQC NMR of **Ru-1** in  $\text{DMSO}d_6$  (400 MHz)

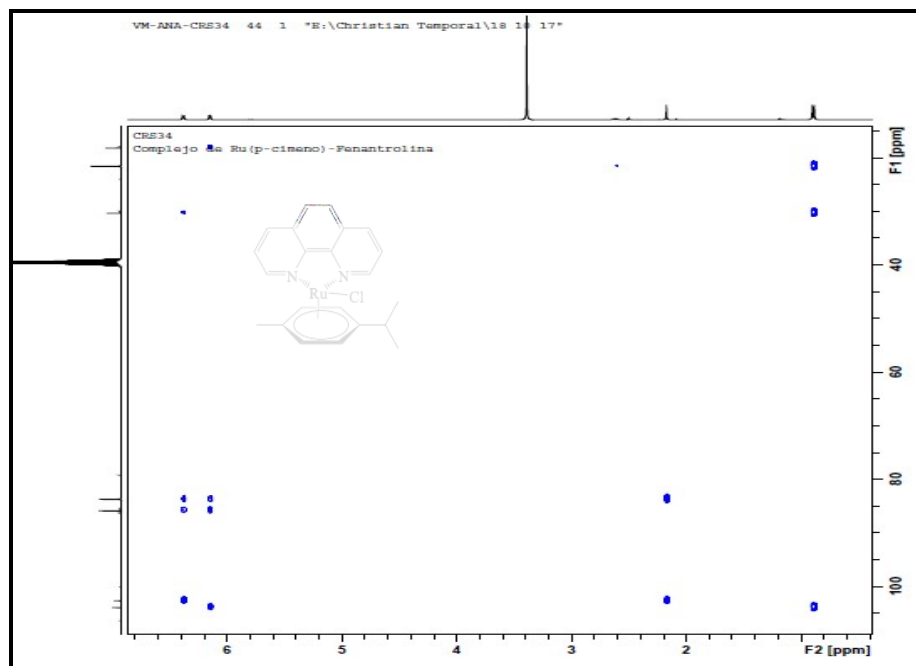

**Figure S10.** Full  $^1\text{H}$ - $^{13}\text{C}$  HMBC NMR of **Ru-1** in  $\text{DMSO}_d_6$ , (400 MHz)

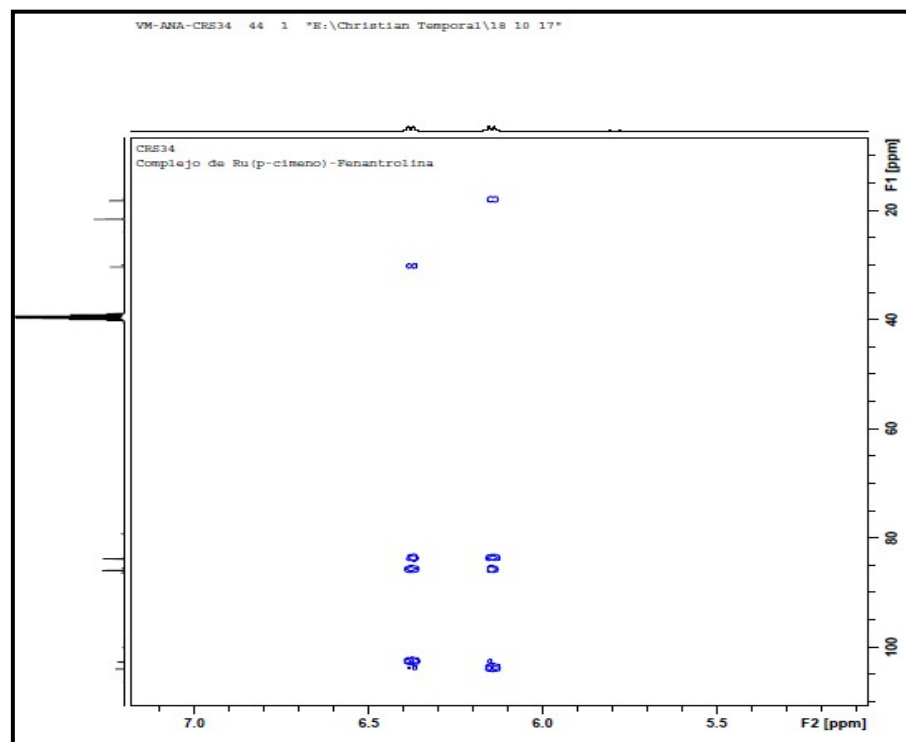

**Figure S11.** Partial  $^1\text{H}$ - $^{13}\text{C}$  HMBC NMR of **Ru-1** in  $\text{DMSO}_d_6$  (400 MHz)

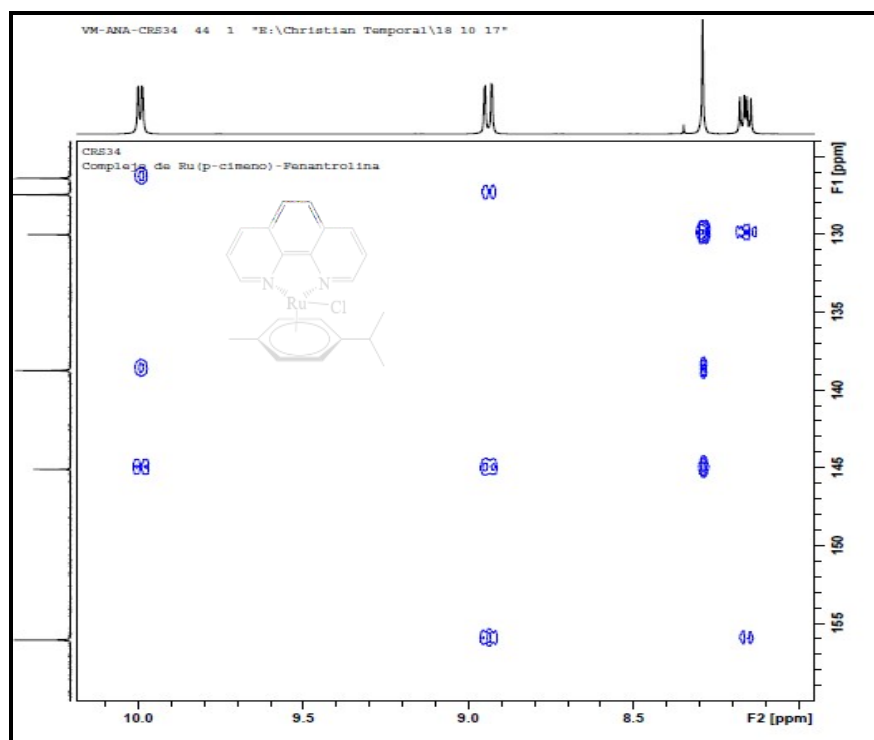

**Figure S12.** Full  $^1\text{H}$ - $^{13}\text{C}$  HMBC NMR of **Ru-1** in  $\text{DMSO}d_6$  (400 MHz)

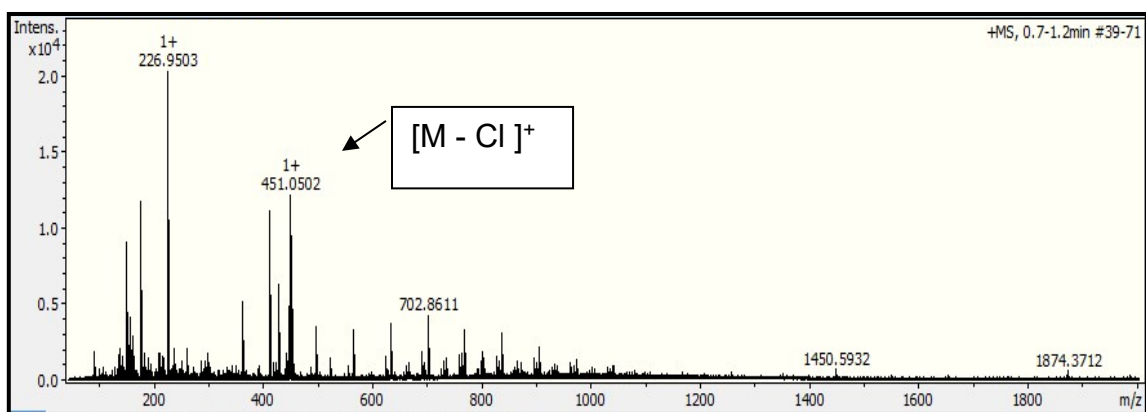

**Figure S13.** HRMS of compound **Ru-1**.



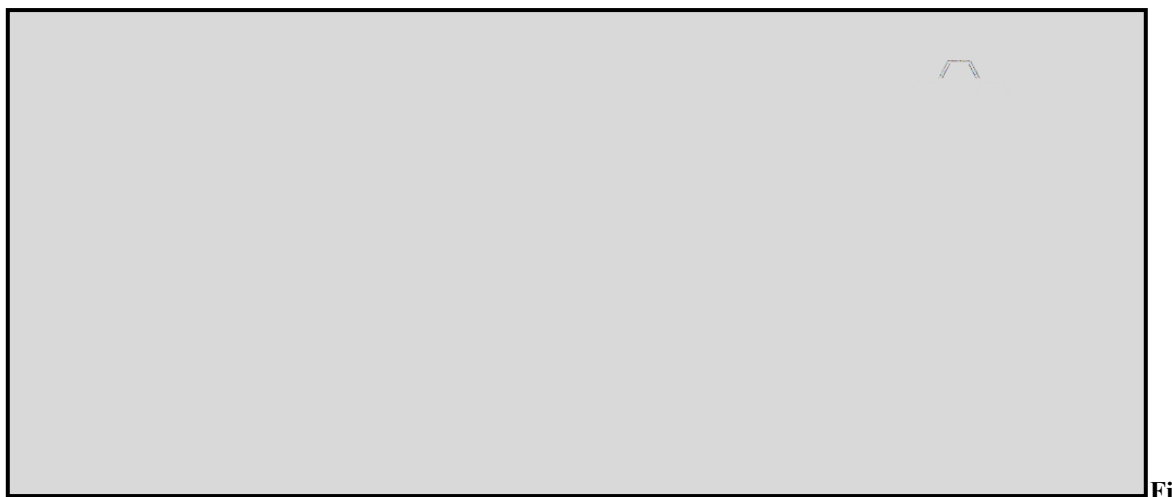

Figure S14. HRMS for Ru-1 (above) and simulated spectrum (below), for  $[M + Na]^+$  for compound Ru-1

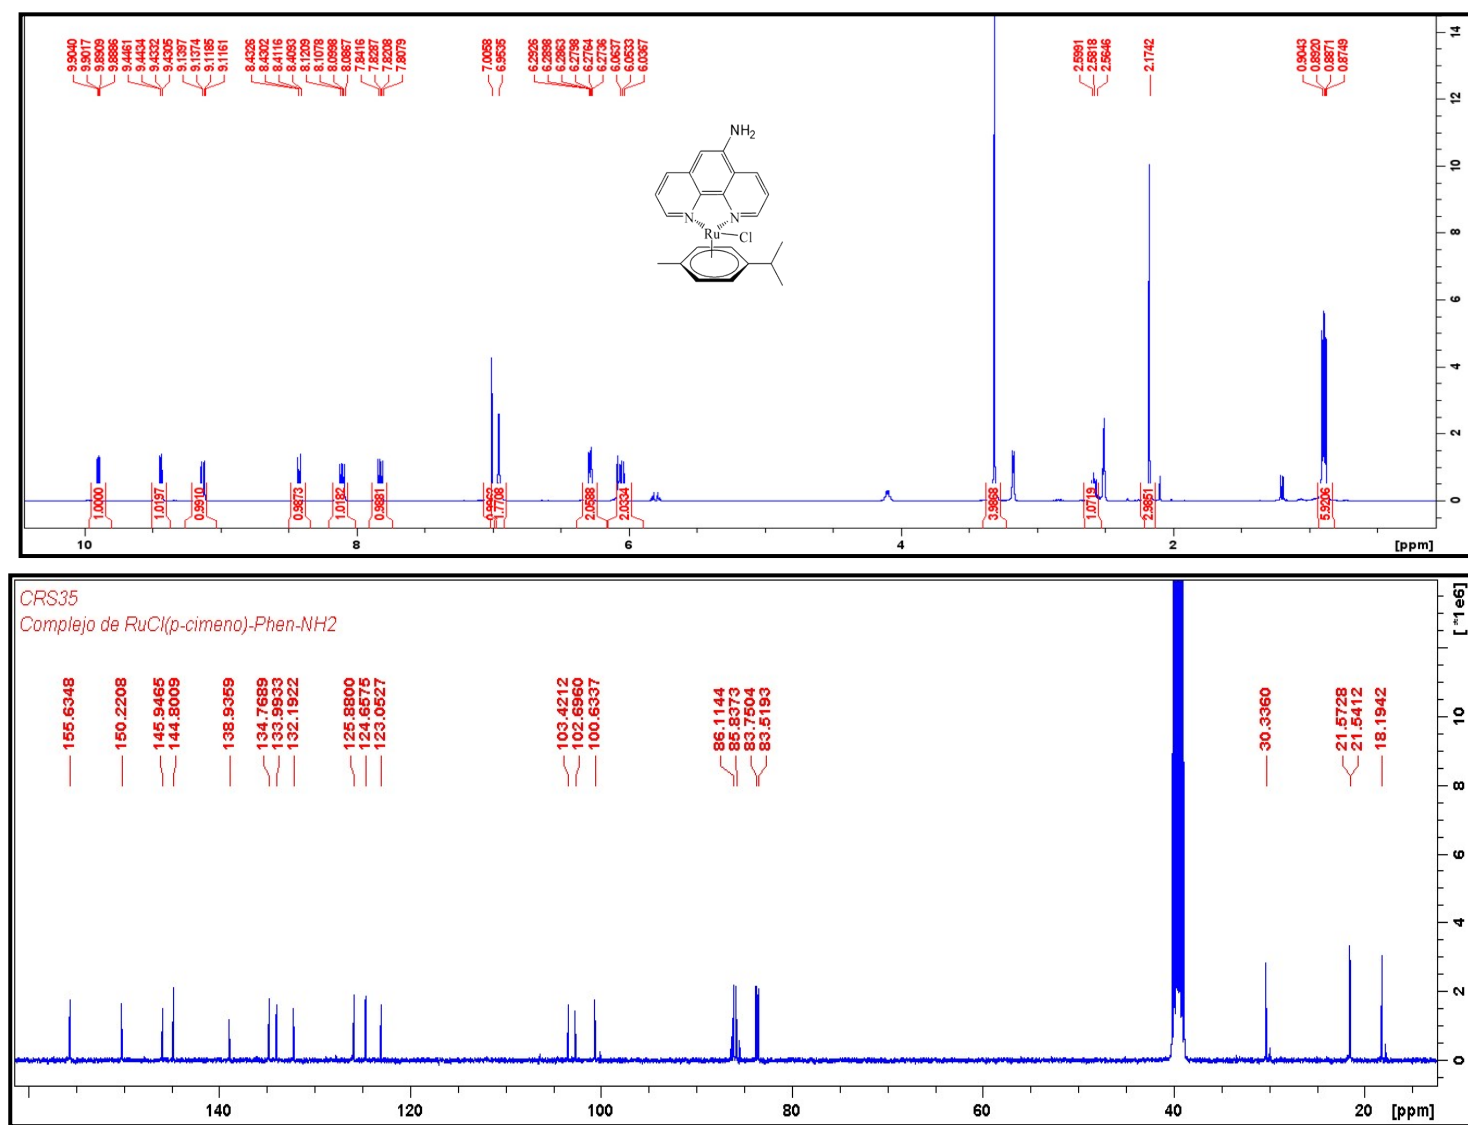

Figure S15. Full  $^1\text{H}$  NMR (top) and  $^{13}\text{C}$  NMR (bottom) of complex Ru-2 in  $\text{DMSO-d}_6$  (400 MHz)

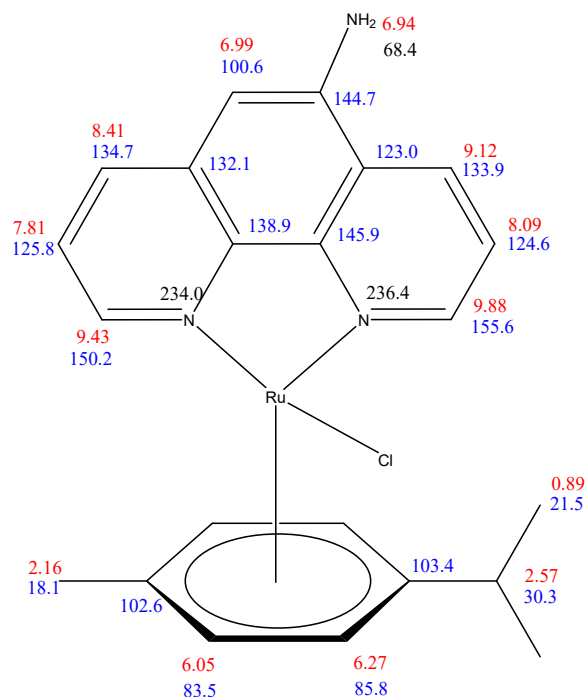

|                                   |                                                                |                              |                                                                |
|-----------------------------------|----------------------------------------------------------------|------------------------------|----------------------------------------------------------------|
| <b>HSQC</b>                       | 138.9                                                          | 3                            | 3                                                              |
|                                   | 144.7                                                          | $\leftrightarrow$ 83.5       | $\leftrightarrow$ 150.2                                        |
| <b>Group CH=N</b>                 | 145.9                                                          | 2                            | 3                                                              |
|                                   | 145.9                                                          | $\leftrightarrow$ 85.8       | 9.12 $\leftrightarrow$ 144.7                                   |
| 9.43 150.2                        |                                                                | 3                            | 3                                                              |
| 9.88 155.6                        |                                                                | $\leftrightarrow$ 103.4      | $\leftrightarrow$ 145.9                                        |
| <b>Group CH aromatic</b>          | 0.89 2.57                                                      | 3                            | 3                                                              |
|                                   | 0.89 2.57                                                      | 6.27 $\leftrightarrow$ 30.3  | $\leftrightarrow$ 155.6                                        |
| 6.05 83.5                         | 6.05 6.27                                                      | 2                            | 2                                                              |
| 6.27 85.8                         | 7.81 8.41                                                      | $\leftrightarrow$ 83.5       | 9.43 $\leftrightarrow$ 125.8                                   |
| 6.99 100.6                        |                                                                | 3                            | 3                                                              |
| 7.81 125.8                        |                                                                | 9.43                         | $\leftrightarrow$ 85.8                                         |
| 8.09 124.6                        | 8.09 9.12                                                      | 3                            | 3                                                              |
|                                   |                                                                | 9.88                         | $\leftrightarrow$ 102.3                                        |
| 8.41 134.7                        |                                                                | $\leftrightarrow$ 102.3      | $\leftrightarrow$ 138.9                                        |
| 9.12 133.9                        | <b><math>^1\text{H}</math>-<math>^{13}\text{C}</math> HMBC</b> | 3                            | 2                                                              |
|                                   |                                                                | 6.94 $\leftrightarrow$ 100.6 | 9.88 $\leftrightarrow$ 124.6                                   |
| <b>Group alkyl CH<sub>3</sub></b> | 0.89 $\leftrightarrow$ 21.5                                    | 3                            | 3                                                              |
|                                   |                                                                | $\leftrightarrow$ 123.0      | $\leftrightarrow$ 133.9                                        |
| 0.89 21.5                         | $\leftrightarrow$ 30.3                                         | 3                            | 3                                                              |
| 2.16 18.1                         |                                                                | 6.99 $\leftrightarrow$ 123.0 | $\leftrightarrow$ 145.9                                        |
| <b>Group CH alkyl</b>             | $\leftrightarrow$ 103.4                                        | 2                            |                                                                |
|                                   |                                                                | $\leftrightarrow$ 132.1      |                                                                |
| 2.57 30.3                         | 2.16 $\leftrightarrow$ 83.5                                    | 3                            | <b><math>^1\text{H}</math>-<math>^{15}\text{N}</math> HMBC</b> |
| <b>Ipsocarbons</b>                |                                                                | $\leftrightarrow$ 134.7      | 3                                                              |
| 102.6                             | $\leftrightarrow$ 102.6                                        | 3                            | 6.99 $\leftrightarrow$ 68.4                                    |
| 103.4                             |                                                                | $\leftrightarrow$ 138.9      | 3                                                              |
| 123.0                             | 2.57 $\leftrightarrow$ 21.5                                    | 3                            | 7.81 $\leftrightarrow$ 234                                     |
| 132.1                             |                                                                | 7.81 $\leftrightarrow$ 132.1 | 3                                                              |
|                                   |                                                                | 2                            | 8.09 $\leftrightarrow$ 236.4                                   |
|                                   |                                                                | $\leftrightarrow$ 150.2      |                                                                |
|                                   |                                                                | $\leftrightarrow$ 103.4      |                                                                |
|                                   | 6.05 $\leftrightarrow$ 18.1                                    |                              |                                                                |

Figure S16.  $^1\text{H}$  RMN data in red,  $^{13}\text{C}$  NMR data in blue, and  $^{15}\text{N}$  NMR data in black

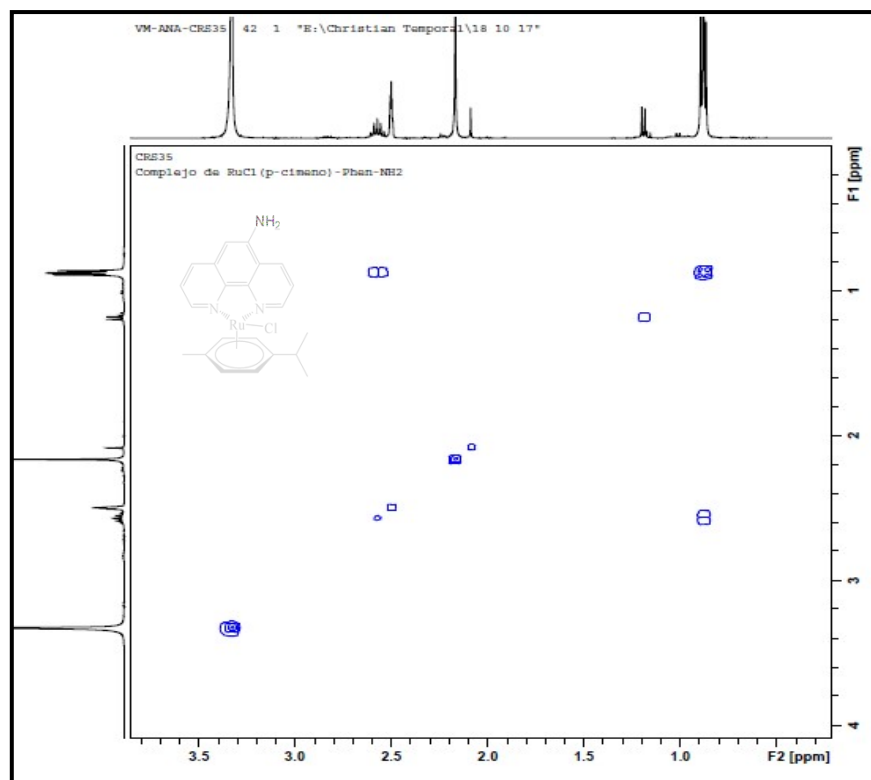

Figure S17. Partial  $^1\text{H}$ - $^1\text{H}$  gCOSY NMR of **Ru-2** in  $\text{DMSO-d}_6$  (400 MHz).

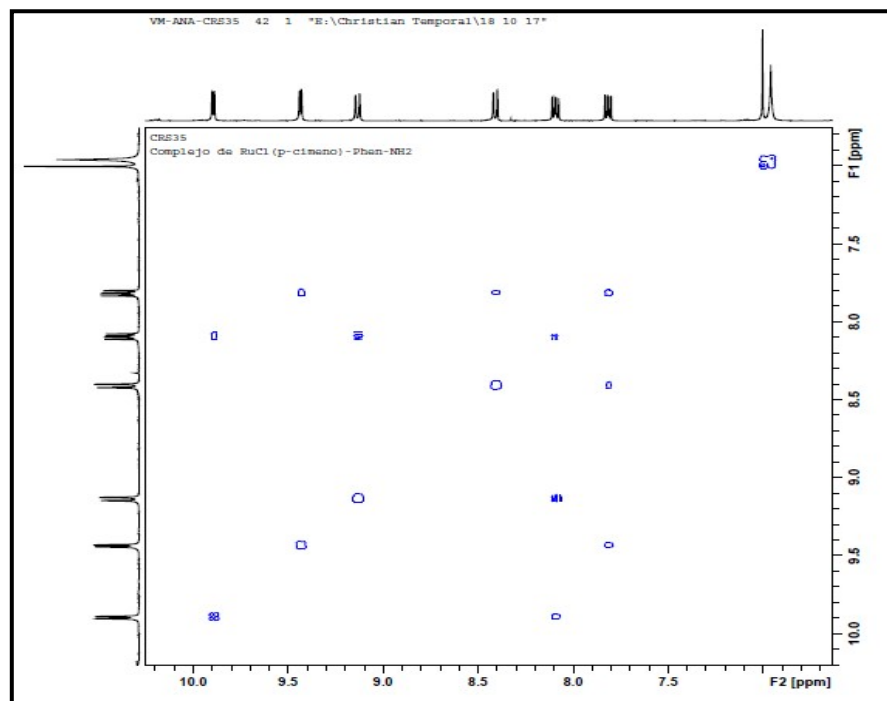

Figure S18. Partial  $^1\text{H}$ - $^1\text{H}$  gCOSY NMR of **Ru-2** in  $\text{DMSO-d}_6$  (400 MHz)

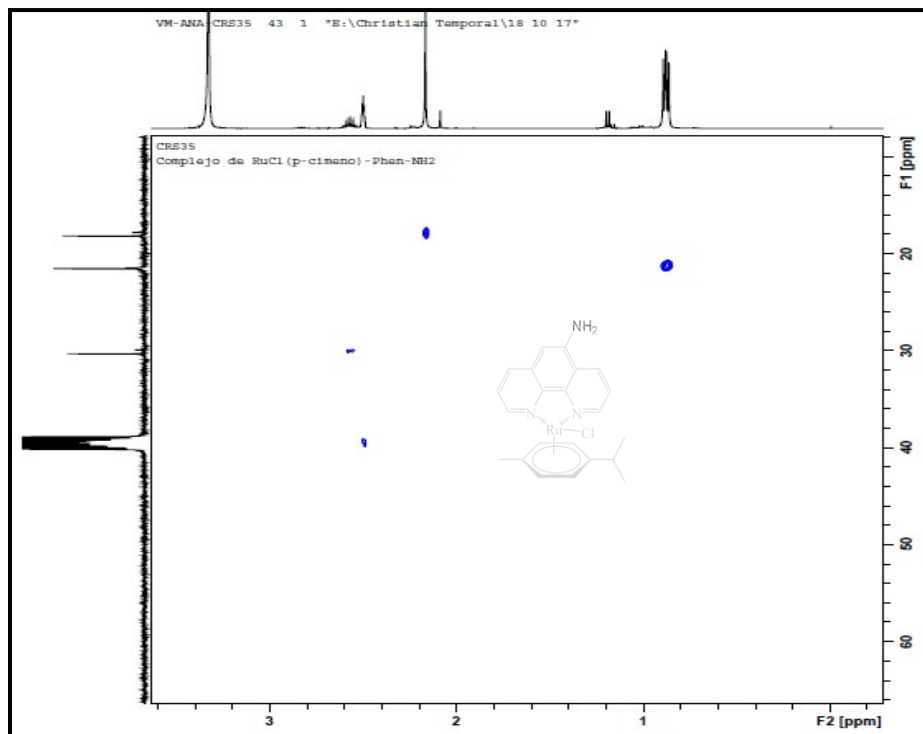

Figure S19. Partial  $^1\text{H}$ - $^{13}\text{C}$  NMR HSQC of **Ru-2** in  $\text{DMSO}_d_6$  (400 MHz)

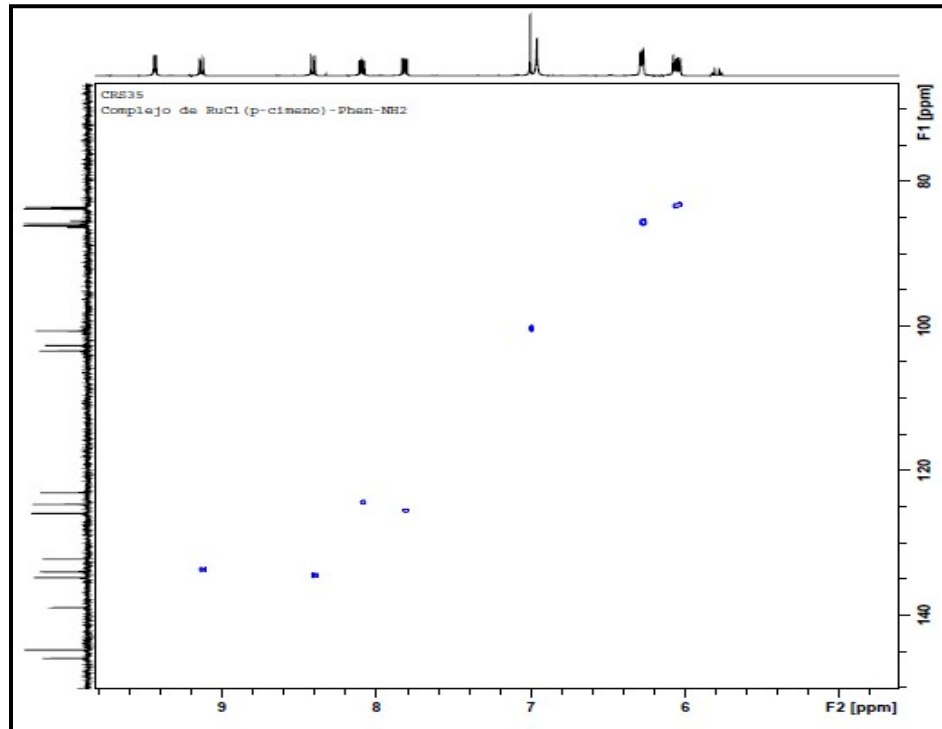

Figure S20. Partial  $^1\text{H}$ - $^{13}\text{C}$  NMR HSQC of **Ru-2** in  $\text{DMSO}_d_6$  (400 MHz)

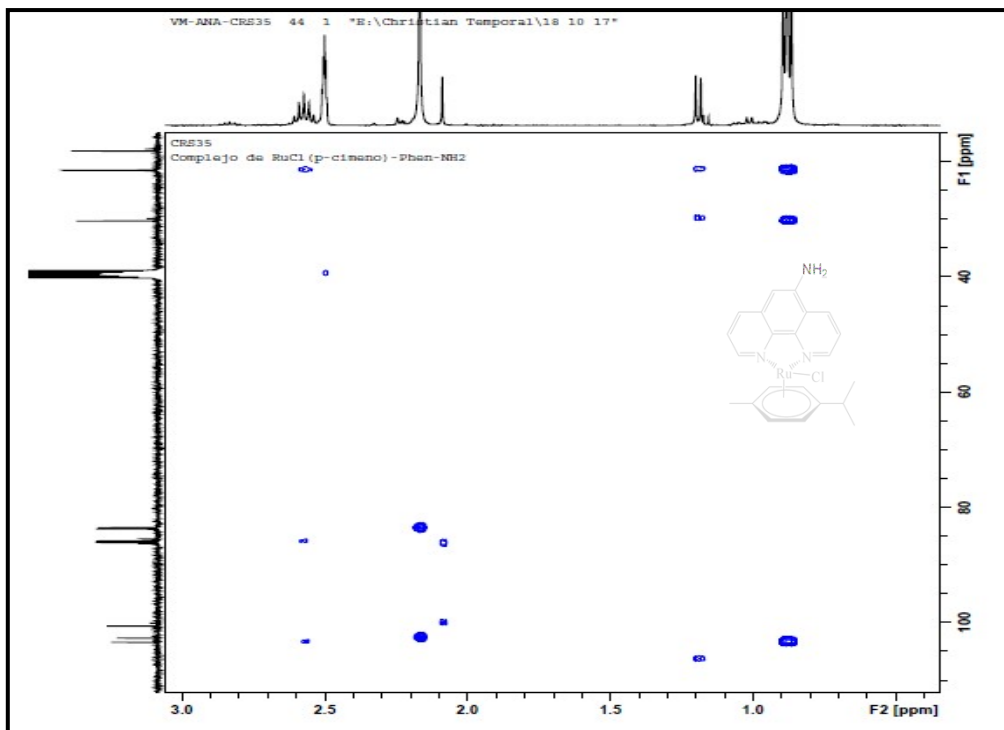

Figure S21. Partial  $^1\text{H}$ - $^{13}\text{C}$  NMR HMBC of **Ru-2** in  $\text{DMSO}_d_6$  (400 MHz)

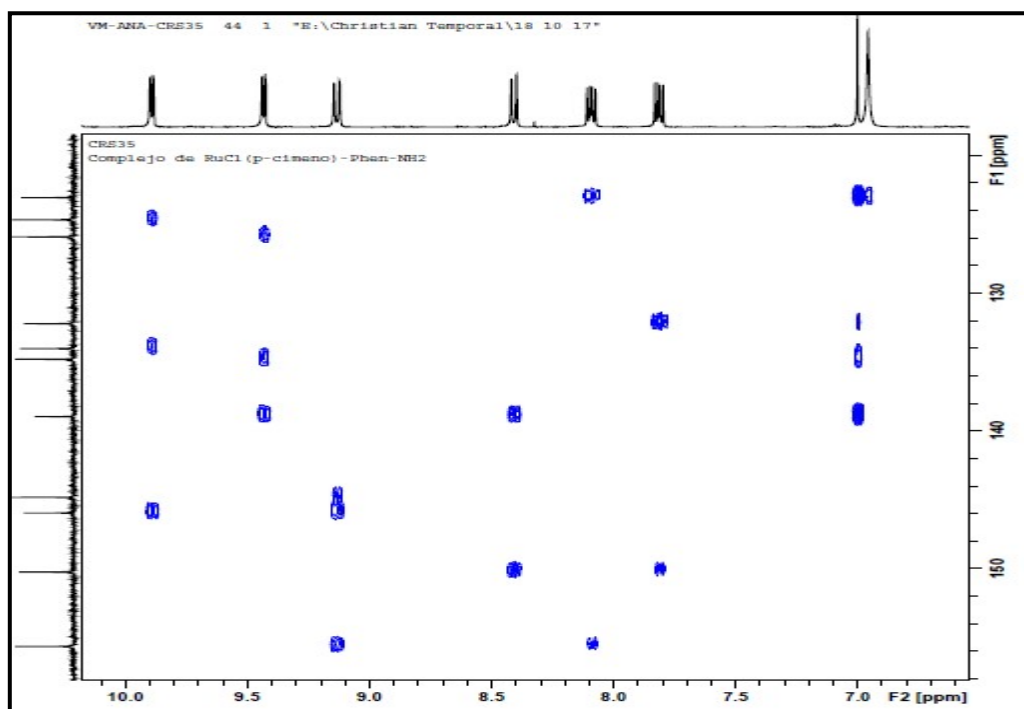

Figure S22. Partial  $^1\text{H}$ - $^{13}\text{C}$  NMR HMBC of **Ru-2** in  $\text{DMSO}_d_6$  (400 MHz)

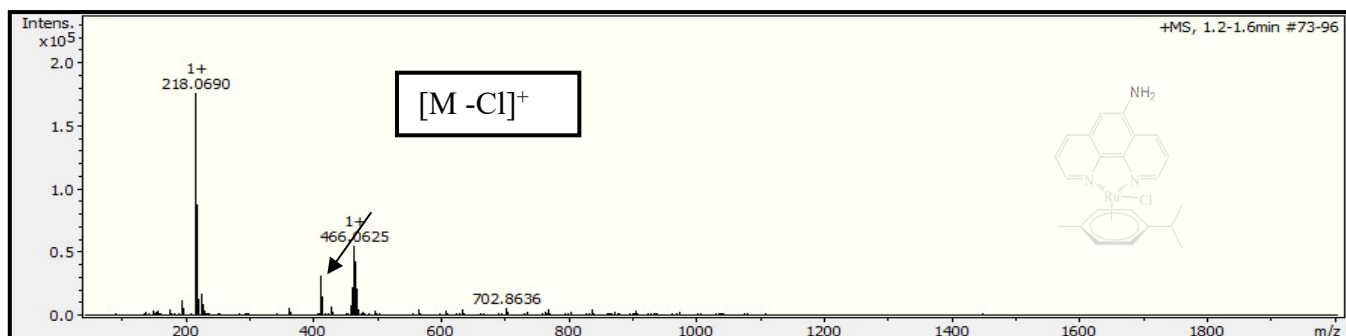

Figure S23. HRMS of compound Ru-2.

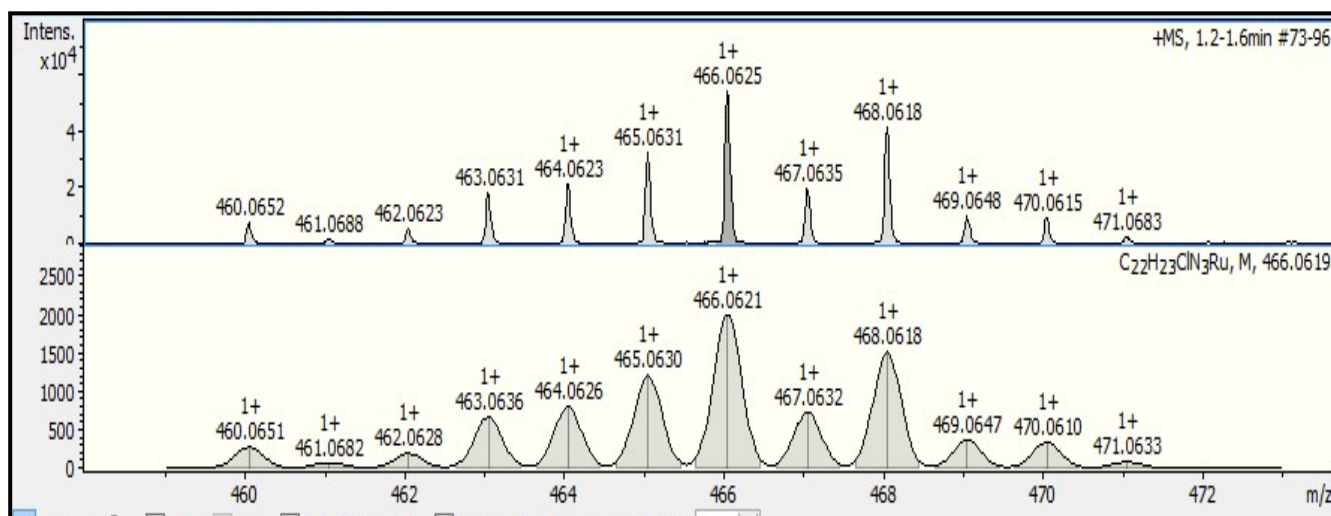

Figure S24. HRMS for Ru-2 (above) and simulated spectrum (below), for [M + Na]<sup>+</sup> for complex Ru-2.

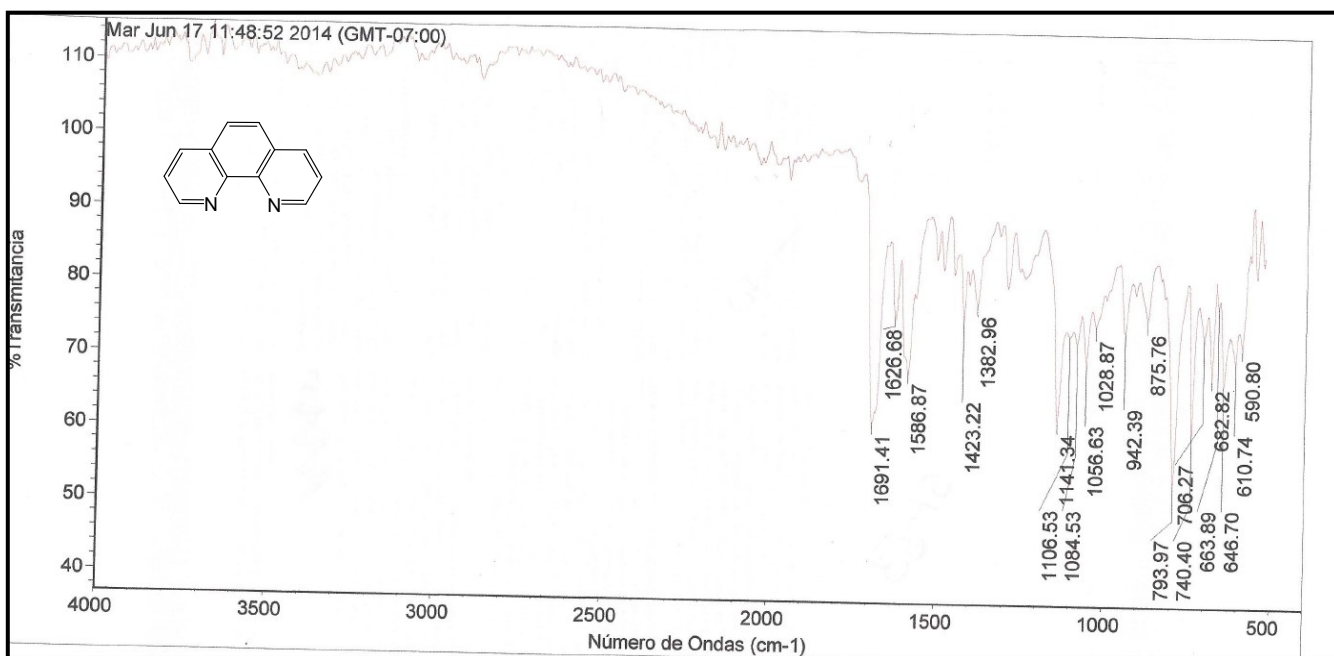

Figure S25. FT-IR spectrum of 1,10-phenanthroline (phen).

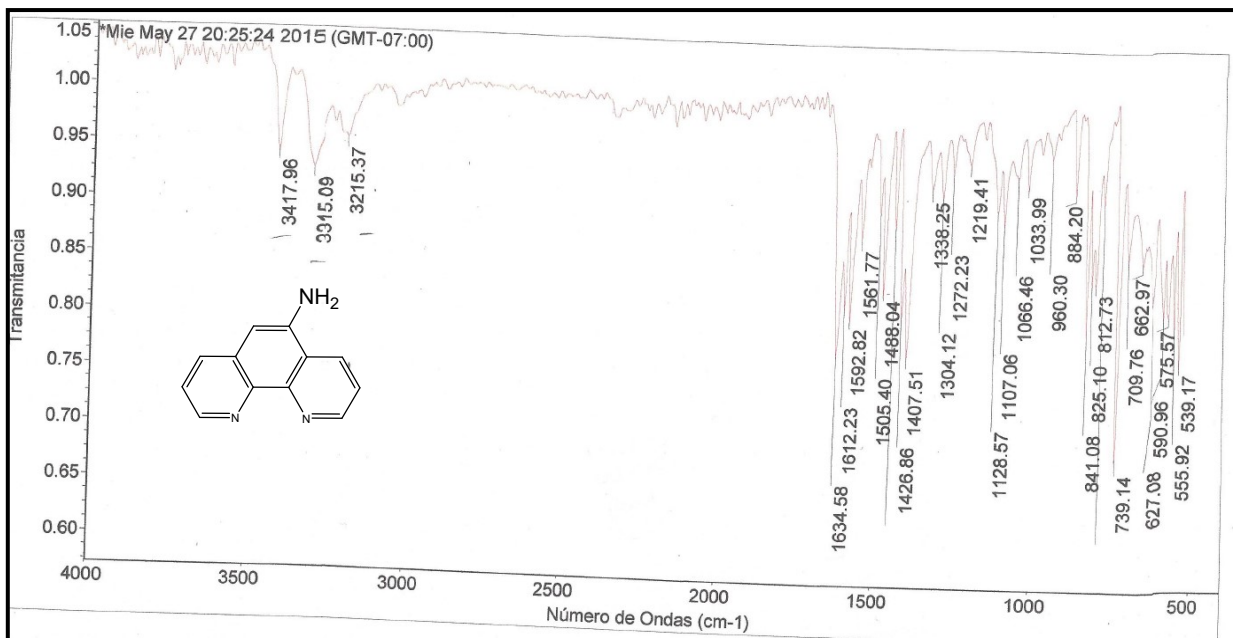

Figure S26. FT-IR spectrum of 5-amino-1,10-phenanthroline (5-phen).

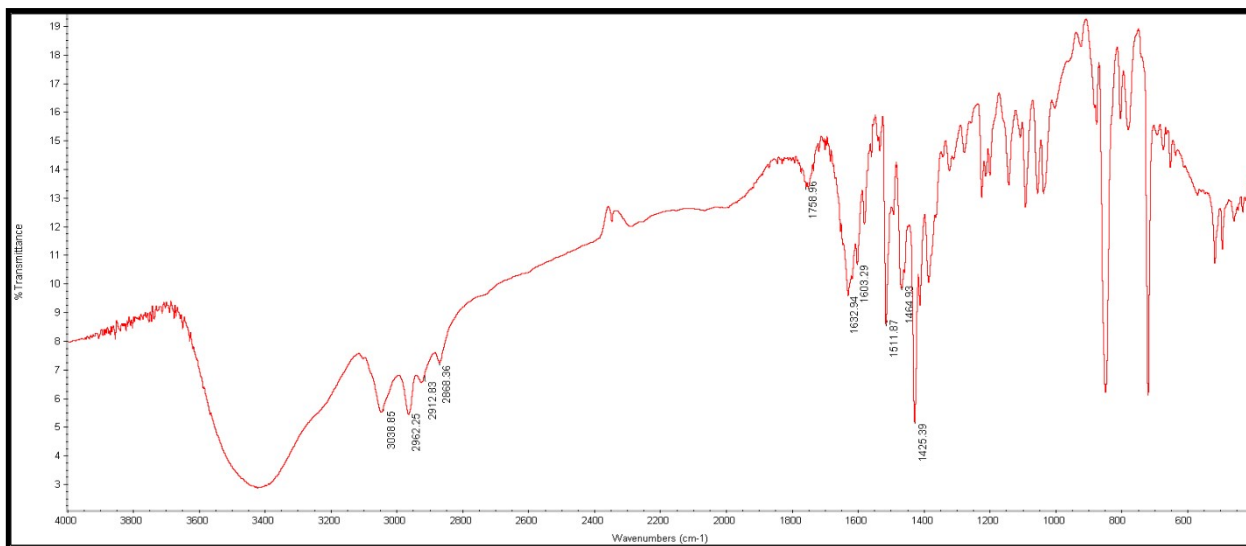

Figure S27. FT-IR spectrum of Ru-1 complex

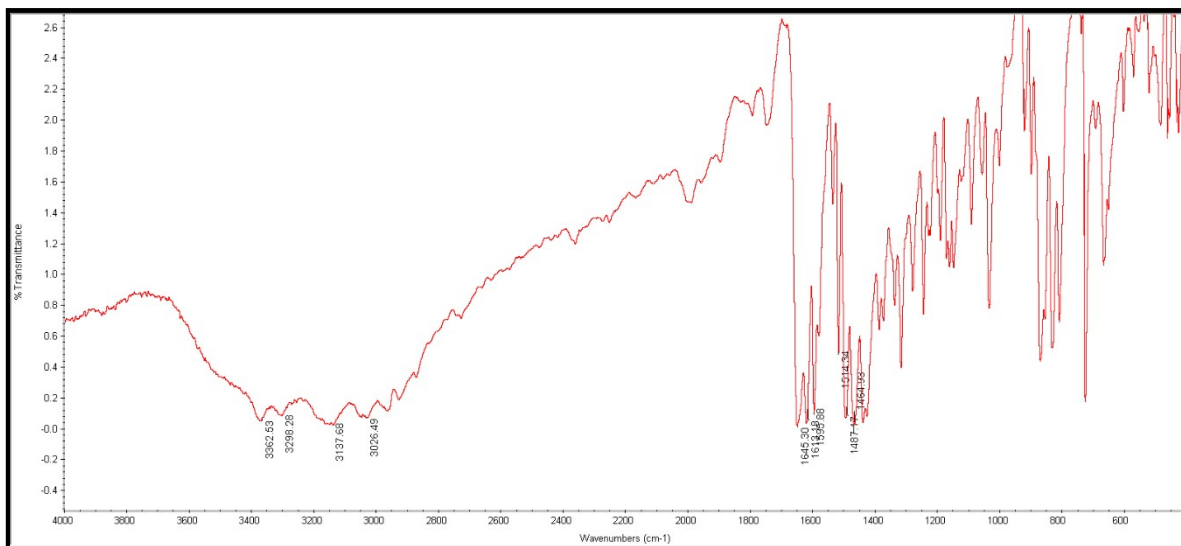

**Figure S28.** FT-IR spectrum of Ru-2 complex.
